# Supplementary material for: Predicting whole genome protein interaction networks from primary sequence data in model and non-model organisms using ENTS
Source: PubMed Central journal article supplement (PMC3848842; doi:10.1186/1471-2164-14-608), 2013-09-10
Supplement: 1471-2164-14-608-S1.pdf [file 1471-2164-14-608-S1.pdf]

Supplemental Table 1. Predictors used for the ENTS classifier. Importance measures indicate the mean decrease in accuracy in the out-of-bag training data upon permutation of that variable.

| Feature                      | Description                                                                                                                                        | <i>A. thaliana</i><br>Importance | <i>S. cerevisiae</i><br>Importance | <i>H. sapiens</i><br>Importance |
|------------------------------|----------------------------------------------------------------------------------------------------------------------------------------------------|----------------------------------|------------------------------------|---------------------------------|
| sum_odds                     | Sum of the odds scores for unique pairs of domains in the protein pair                                                                             | 0.0621                           | 0.0536                             | 0.0521                          |
| highest_odds                 | The highest observed odds score for a pair of domains in the protein pair (floored at 0)                                                           | 0.0604                           | 0.0530                             | 0.0578                          |
| lowest_odds                  | The lowest observed odds score for a pair of domains in the protein pair (capped at 0)                                                             | 0.0500                           | 0.0414                             | 0.0313                          |
| not_observed                 | The number of unique domain pairs in the protein pair never observed in any known interactions                                                     | 0.0573                           | 0.0646                             | 0.0627                          |
| not_observed_frac            | The fraction of unique domain pairs in the protein pair never observed in any known interactions                                                   | 0.0594                           | 0.0470                             | 0.0564                          |
| n_odds_pairs                 | The number of unique domain pairs observed in at least 1 known interaction                                                                         | 0.0441                           | 0.0404                             | 0.0435                          |
| n_domine_pairs               | The number of unique domain pairs predicted or verified to interact in the DOMINE database                                                         | 0.0370                           | 0.0247                             | 0.0342                          |
| highest_domine_conf          | The highest confidence score for a pair of domains verified to interact in the DOMINE database                                                     | 0.0432                           | 0.0273                             | 0.0389                          |
| cytoplasmic1                 | The MultiLoc2 probability of localization in the cytoplasm for the first protein in the pair                                                       | 0.0313                           | 0.0458                             | 0.0445                          |
| nuclear1                     | The MultiLoc2 probability of localization in the nucleus for the first protein in the pair                                                         | 0.0420                           | 0.0480                             | 0.0394                          |
| peroxisomal1                 | The MultiLoc2 probability of localization in the peroxisome for the first protein in the pair                                                      | 0.0421                           | 0.0367                             | 0.0383                          |
| ER1                          | The MultiLoc2 probability of localization in the ER for the first protein in the pair                                                              | 0.0305                           | 0.0289                             | 0.0336                          |
| mitochondrial1               | The MultiLoc2 probability of localization in the mitochondrion for the first protein in the pair                                                   | 0.0384                           | 0.0352                             | 0.0423                          |
| extracellular1               | The MultiLoc2 probability of localization in the extracellular space for the first protein in the pair                                             | 0.0371                           | 0.0278                             | 0.0316                          |
| plasma membrane1             | The MultiLoc2 probability of localization in the plasma membrane for the first protein in the pair                                                 | 0.0306                           | 0.0301                             | 0.0326                          |
| Golgi apparatus1             | The MultiLoc2 probability of localization in the Golgi apparatus for the first protein in the pair                                                 | 0.0250                           | 0.0355                             | 0.0354                          |
| chloroplast1                 | The MultiLoc2 probability of localization in the chloroplast for the first protein in the pair (plant only)                                        | 0.0193                           | N/A                                | N/A                             |
| vacuolar1                    | The MultiLoc2 probability of localization in the vacuole for the first protein in the pair (plant and fungal)                                      | 0.0316                           | 0.0237                             | N/A                             |
| lysosomal1                   | The MultiLoc2 probability of localization in the lysosome for the first protein in the pair (animal only)                                          | N/A                              | N/A                                | 0.0318                          |
| svm_target_score_sp1         | MultiLoc2 score for detection of N-terminal targeting peptides for secretory pathways in the first protein of the pair                             | 0.0439                           | 0.0292                             | 0.0433                          |
| svm_target_score_mtp1        | MultiLoc2 score for detection of N-terminal targeting peptides for mitochondrion in the first protein of the pair                                  | 0.0300                           | 0.0351                             | 0.0390                          |
| svm_target_score_ctp1        | MultiLoc2 score for detection of N-terminal targeting peptides for chloroplast in the first protein of the pair (plant only)                       | 0.0183                           | N/A                                | N/A                             |
| svm_target_score_mtp_vs_ctp1 | MultiLoc2 score for detection of N-terminal targeting peptides contrasting mitochondrion with chloroplast in the first protein of the pair (plant) | 0.0395                           | N/A                                | N/A                             |
| svm_target_score_oth1        | MultiLoc2 score for detection of N-terminal targeting peptides for other compartments in the first protein of                                      | 0.0252                           | 0.0279                             | 0.0367                          |

|                           |                                                                                                                                        |        |        |        |
|---------------------------|----------------------------------------------------------------------------------------------------------------------------------------|--------|--------|--------|
|                           | the pair                                                                                                                               |        |        |        |
| svm_sa_score1             | MultiLoc2 score for presence of signal anchor for membrane proteins of secretory pathway in the first protein of the pair              | 0.0438 | 0.0470 | 0.0384 |
| svm_aac_score_nuc1        | MultiLoc2 score for whether the overall amino acid content of the first protein matches the nucleus                                    | 0.0313 | 0.0464 | 0.0382 |
| svm_aac_score_cyt1        | MultiLoc2 score for whether the overall amino acid content of the first protein matches the cytoplasm                                  | 0.0409 | 0.0481 | 0.0497 |
| svm_aac_score_nuc_vs_cyt1 | MultiLoc2 score for contrasting the overall amino acid content of the first protein with respect to nuclear vs. cytoplasm localization | 0.0234 | 0.0421 | 0.0318 |
| svm_aac_score_mit1        | MultiLoc2 score for whether the overall amino acid content of the first protein matches the mitochondrion                              | 0.0474 | 0.0474 | 0.0501 |
| svm_aac_score_chl1        | MultiLoc2 score for whether the overall amino acid content of the first protein (plant) matches the chloroplast                        | 0.0504 | N/A    | N/A    |
| svm_aac_score_ext1        | MultiLoc2 score for whether the overall amino acid content of the first protein matches the extracellular space                        | 0.0503 | 0.0490 | 0.0503 |
| svm_aac_score_pm1         | MultiLoc2 score for whether the overall amino acid content of the first protein matches the plasma membrane                            | 0.0508 | 0.0525 | 0.0544 |
| svm_aac_score_per1        | MultiLoc2 score for whether the overall amino acid content of the first protein matches the peroxisome                                 | 0.0420 | 0.0460 | 0.0522 |
| svm_aac_score_er1         | MultiLoc2 score for whether the overall amino acid content of the first protein matches the ER                                         | 0.0511 | 0.0409 | 0.0506 |
| svm_aac_score_gol1        | MultiLoc2 score for whether the overall amino acid content of the first protein matches the Golgi apparatus                            | 0.0501 | 0.0512 | 0.0543 |
| svm_aac_score_vac1        | MultiLoc2 score for whether the overall amino acid content of the first protein matches the vacuole (plant and fungal)                 | 0.0441 | 0.0442 | N/A    |
| goloc_score_nuc1          | MultiLoc2 score for whether inferred GO categories of the first protein match the nucleus                                              | 0.0406 | 0.0344 | 0.0462 |
| goloc_score_cyt1          | MultiLoc2 score for whether inferred GO categories of the first protein match the cytoplasm                                            | 0.0370 | 0.0364 | 0.0397 |
| goloc_score_mit1          | MultiLoc2 score for whether inferred GO categories of the first protein match the mitochondrion                                        | 0.0381 | 0.0342 | 0.0404 |
| goloc_score_chl1          | MultiLoc2 score for whether inferred GO categories of the first protein match the chloroplast (plant)                                  | 0.0277 | N/A    | N/A    |
| goloc_score_ext1          | MultiLoc2 score for whether inferred GO categories of the first protein match the extracellular space                                  | 0.0307 | 0.0287 | 0.0470 |
| goloc_score_pm1           | MultiLoc2 score for whether inferred GO categories of the first protein match the plasma membrane                                      | 0.0356 | 0.0299 | 0.0441 |
| goloc_score_per1          | MultiLoc2 score for whether inferred GO categories of the first protein match the peroxisome                                           | 0.0433 | 0.0335 | 0.0387 |
| goloc_score_er1           | MultiLoc2 score for whether inferred GO categories of the first protein match the ER                                                   | 0.0375 | 0.0312 | 0.0466 |
| goloc_score_gol1          | MultiLoc2 score for whether inferred GO categories of the first protein match the Golgi apparatus                                      | 0.0310 | 0.0333 | 0.0405 |
| goloc_score_vac1          | MultiLoc2 score for whether inferred GO categories of the first protein match the vacuole (plant and fungus)                           | 0.0400 | 0.0372 | N/A    |
| phyloloc_score_nuc1       | MultiLoc2 score for whether phylogenetic profile of first protein BLAST hits indicates nuclear localization                            | 0.0426 | 0.0433 | 0.0484 |
| phyloloc_score_cyt1       | MultiLoc2 score for whether phylogenetic profile of first protein BLAST hits indicates cytoplasmic                                     | 0.0458 | 0.0468 | 0.0476 |

|                                     |                                                                                                                                 |        |         |        |
|-------------------------------------|---------------------------------------------------------------------------------------------------------------------------------|--------|---------|--------|
|                                     | localization                                                                                                                    |        |         |        |
| phyloloc_score_mit1                 | MultiLoc2 score for whether phylogenetic profile of first protein BLAST hits indicates mitochondrial localization               | 0.0470 | 0.0560  | 0.0494 |
| phyloloc_score_chl1                 | MultiLoc2 score for whether phylogenetic profile of first protein BLAST hits indicates chloroplast localization (plant)         | 0.0471 | N/A     | N/A    |
| phyloloc_score_ext1                 | MultiLoc2 score for whether phylogenetic profile of first protein BLAST hits indicates extracellular localization               | 0.0521 | 0.0468  | 0.0468 |
| phyloloc_score_pm1                  | MultiLoc2 score for whether phylogenetic profile of first protein BLAST hits indicates plasma membrane localization             | 0.0485 | 0.0508  | 0.0501 |
| phyloloc_score_per1                 | MultiLoc2 score for whether phylogenetic profile of first protein BLAST hits indicates peroxisomal localization                 | 0.0512 | 0.0533  | 0.0498 |
| phyloloc_score_er1                  | MultiLoc2 score for whether phylogenetic profile of first protein BLAST hits indicates ER localization                          | 0.0503 | 0.0537  | 0.0517 |
| phyloloc_score_gol1                 | MultiLoc2 score for whether phylogenetic profile of first protein BLAST hits indicates Golgi apparatus localization             | 0.0446 | 0.0475  | 0.0511 |
| phyloloc_score_vac1                 | MultiLoc2 score for whether phylogenetic profile of first protein BLAST hits indicates vacuolar localization (plant and fungal) | 0.0507 | 0.0529  | N/A    |
| motif_search_er_target1             | MultiLoc2 indicator of ER targeting signal for the first protein                                                                | 0.0019 | 0.0011  | 0.0013 |
| motif_search_pm_receptor_domain1    | MultiLoc2 indicator of plasma membrane targeting signal for the first protein                                                   | 0.0000 | -0.0079 | 0.0166 |
| motif_search_peroxi_target1         | MultiLoc2 indicator of peroxisomal targeting signal for the first protein                                                       | 0.0092 | -0.0032 | 0.0101 |
| motif_search_nuclear_bipartite1     | MultiLoc2 indicator of nuclear bipartite protein for the first protein                                                          | 0.0118 | 0.0111  | 0.0111 |
| motif_search_predict_NLS1           | MultiLoc2 indicator of nuclear localization signal for the first protein                                                        | 0.0144 | 0.0138  | 0.0150 |
| motif_search_nls_mono1              | MultiLoc2 indicator of nuclear localization signal for the first protein                                                        | 0.0160 | 0.0219  | 0.0243 |
| motif_search_dna_associated_domain1 | MultiLoc2 indicator of dna associated domain for the first protein                                                              | 0.0183 | 0.0062  | 0.0253 |
| phyloloc_score_lys1                 | MultiLoc2 score for whether phylogenetic profile of first protein BLAST hits indicates lysosome localization (animal)           | N/A    | N/A     | 0.0547 |
| goloc_score_lys1                    | MultiLoc2 score for whether inferred GO categories of the first protein match the lysosome membrane (animal)                    | N/A    | N/A     | 0.0422 |
| svm_aac_score_lys1                  | MultiLoc2 score for whether the overall amino acid content of the first protein matches the lysosome (animal)                   | N/A    | N/A     | 0.0507 |
| cytoplasmic2                        | The MultiLoc2 probability of localization in the cytoplasm for the first protein in the pair                                    | 0.0383 | 0.0410  | 0.0403 |
| nuclear2                            | The MultiLoc2 probability of localization in the nucleus for the second protein in the pair                                     | 0.0455 | 0.0486  | 0.0364 |
| peroxisomal2                        | The MultiLoc2 probability of localization in the peroxisome for the second protein in the pair                                  | 0.0418 | 0.0379  | 0.0442 |
| ER2                                 | The MultiLoc2 probability of localization in the ER for the second protein in the pair                                          | 0.0323 | 0.0211  | 0.0276 |
| mitochondrial2                      | The MultiLoc2 probability of localization in the mitochondrion for the second protein in the pair                               | 0.0315 | 0.0403  | 0.0312 |

|                              |                                                                                                                                                     |        |        |        |
|------------------------------|-----------------------------------------------------------------------------------------------------------------------------------------------------|--------|--------|--------|
| extracellular2               | The MultiLoc2 probability of localization in the extracellular space for the second protein in the pair                                             | 0.0372 | 0.0323 | 0.0344 |
| plasma membrane2             | The MultiLoc2 probability of localization in the plasma membrane for the second protein in the pair                                                 | 0.0352 | 0.0329 | 0.0371 |
| Golgi apparatus2             | The MultiLoc2 probability of localization in the Golgi apparatus for the second protein in the pair                                                 | 0.0307 | 0.0364 | 0.0357 |
| chloroplast2                 | The MultiLoc2 probability of localization in the chloroplast for the second protein in the pair (plant only)                                        | 0.0255 | N/A    | N/A    |
| vacuolar2                    | The MultiLoc2 probability of localization in the vacuole for the second protein in the pair (plant and fungal)                                      | 0.0344 | 0.0283 | N/A    |
| lysosomal2                   | The MultiLoc2 probability of localization in the lysosome for the second protein in the pair (animal only)                                          | N/A    | N/A    | 0.0303 |
| svm_target_score_sp2         | MultiLoc2 score for detection of N-terminal targeting peptides for secretory pathways in the second protein of the pair                             | 0.0442 | 0.0374 | 0.0431 |
| svm_target_score_mtp2        | MultiLoc2 score for detection of N-terminal targeting peptides for mitochondrion in the second protein of the pair                                  | 0.0326 | 0.0366 | 0.0357 |
| svm_target_score_ctp2        | MultiLoc2 score for detection of N-terminal targeting peptides for chloroplast in the second protein of the pair (plant only)                       | 0.0314 | N/A    | N/A    |
| svm_target_score_mtp_vs_ctp2 | MultiLoc2 score for detection of N-terminal targeting peptides contrasting mitochondrion with chloroplast in the second protein of the pair (plant) | 0.0442 | N/A    | N/A    |
| svm_target_score_oth2        | MultiLoc2 score for detection of N-terminal targeting peptides for other compartments in the second protein of the pair                             | 0.0367 | 0.0375 | 0.0397 |
| svm_sa_score2                | MultiLoc2 score for presence of signal anchor for membrane proteins of secretory pathway in the second protein of the pair                          | 0.0436 | 0.0423 | 0.0396 |
| svm_aac_score_nuc2           | MultiLoc2 score for whether the overall amino acid content of the second protein matches the nucleus                                                | 0.0346 | 0.0411 | 0.0445 |
| svm_aac_score_cyt2           | MultiLoc2 score for whether the overall amino acid content of the second protein matches the cytoplasm                                              | 0.0253 | 0.0504 | 0.0505 |
| svm_aac_score_nuc_vs_cyt2    | MultiLoc2 score for contrasting the overall amino acid content of the second protein with respect to nuclear vs. cytoplasm localization             | 0.0281 | 0.0349 | 0.0380 |
| svm_aac_score_mit2           | MultiLoc2 score for whether the overall amino acid content of the second protein matches the mitochondrion                                          | 0.0513 | 0.0480 | 0.0551 |
| svm_aac_score_chl2           | MultiLoc2 score for whether the overall amino acid content of the second protein (plant) matches the chloroplast                                    | 0.0522 | N/A    | N/A    |
| svm_aac_score_ext2           | MultiLoc2 score for whether the overall amino acid content of the second protein matches the extracellular space                                    | 0.0521 | 0.0542 | 0.0537 |
| svm_aac_score_pm2            | MultiLoc2 score for whether the overall amino acid content of the second protein matches the plasma membrane                                        | 0.0508 | 0.0528 | 0.0555 |
| svm_aac_score_per2           | MultiLoc2 score for whether the overall amino acid content of the second protein matches the peroxisome                                             | 0.0485 | 0.0420 | 0.0536 |
| svm_aac_score_er2            | MultiLoc2 score for whether the overall amino acid content of the second protein matches the ER                                                     | 0.0474 | 0.0425 | 0.0477 |
| svm_aac_score_gol2           | MultiLoc2 score for whether the overall amino acid                                                                                                  | 0.0454 | 0.0506 | 0.0519 |

|                         |                                                                                                                                  |        |        |        |
|-------------------------|----------------------------------------------------------------------------------------------------------------------------------|--------|--------|--------|
|                         | content of the second protein matches the Golgi apparatus                                                                        |        |        |        |
| svm_aac_score_vac2      | MultiLoc2 score for whether the overall amino acid content of the second protein matches the vacuole (plant and fungal)          | 0.0458 | 0.0434 | N/A    |
| goloc_score_nuc2        | MultiLoc2 score for whether inferred GO categories of the second protein match the nucleus                                       | 0.0377 | 0.0322 | 0.0440 |
| goloc_score_cyt2        | MultiLoc2 score for whether inferred GO categories of the second protein match the cytoplasm                                     | 0.0413 | 0.0308 | 0.0337 |
| goloc_score_mit2        | MultiLoc2 score for whether inferred GO categories of the second protein match the mitochondrion                                 | 0.0380 | 0.0328 | 0.0388 |
| goloc_score_chl2        | MultiLoc2 score for whether inferred GO categories of the second protein match the chloroplast (plant)                           | 0.0380 | N/A    | N/A    |
| goloc_score_ext2        | MultiLoc2 score for whether inferred GO categories of the second protein match the extracellular space                           | 0.0386 | 0.0283 | 0.0436 |
| goloc_score_pm2         | MultiLoc2 score for whether inferred GO categories of the second protein match the plasma membrane                               | 0.0392 | 0.0352 | 0.0435 |
| goloc_score_per2        | MultiLoc2 score for whether inferred GO categories of the second protein match the peroxisome                                    | 0.0368 | 0.0357 | 0.0365 |
| goloc_score_er2         | MultiLoc2 score for whether inferred GO categories of the second protein match the ER                                            | 0.0315 | 0.0299 | 0.0392 |
| goloc_score_gol2        | MultiLoc2 score for whether inferred GO categories of the second protein match the Golgi apparatus                               | 0.0279 | 0.0357 | 0.0433 |
| goloc_score_vac2        | MultiLoc2 score for whether inferred GO categories of the second protein match the vacuole (plant and fungus)                    | 0.0399 | 0.0330 | N/A    |
| phyloloc_score_nuc2     | MultiLoc2 score for whether phylogenetic profile of second protein BLAST hits indicates nuclear localization                     | 0.0443 | 0.0435 | 0.0476 |
| phyloloc_score_cyt2     | MultiLoc2 score for whether phylogenetic profile of second protein BLAST hits indicates cytoplasmic localization                 | 0.0414 | 0.0473 | 0.0492 |
| phyloloc_score_mit2     | MultiLoc2 score for whether phylogenetic profile of second protein BLAST hits indicates mitochondrial localization               | 0.0500 | 0.0548 | 0.0512 |
| phyloloc_score_chl2     | MultiLoc2 score for whether phylogenetic profile of second protein BLAST hits indicates chloroplast localization (plant)         | 0.0451 | N/A    | N/A    |
| phyloloc_score_ext2     | MultiLoc2 score for whether phylogenetic profile of second protein BLAST hits indicates extracellular localization               | 0.0509 | 0.0475 | 0.0483 |
| phyloloc_score_pm2      | MultiLoc2 score for whether phylogenetic profile of second protein BLAST hits indicates plasma membrane localization             | 0.0497 | 0.0490 | 0.0521 |
| phyloloc_score_per2     | MultiLoc2 score for whether phylogenetic profile of second protein BLAST hits indicates peroxisomal localization                 | 0.0489 | 0.0524 | 0.0491 |
| phyloloc_score_er2      | MultiLoc2 score for whether phylogenetic profile of second protein BLAST hits indicates ER localization                          | 0.0498 | 0.0521 | 0.0528 |
| phyloloc_score_gol2     | MultiLoc2 score for whether phylogenetic profile of second protein BLAST hits indicates Golgi apparatus localization             | 0.0435 | 0.0474 | 0.0506 |
| phyloloc_score_vac2     | MultiLoc2 score for whether phylogenetic profile of second protein BLAST hits indicates vacuolar localization (plant and fungal) | 0.0502 | 0.0578 | N/A    |
| motif_search_er_target2 | MultiLoc2 indicator of ER targeting signal for the second protein                                                                | 0.0008 | 0.0056 | 0.0030 |

|                                     |                                                                                                                        |        |         |        |
|-------------------------------------|------------------------------------------------------------------------------------------------------------------------|--------|---------|--------|
| motif_search_pm_receptor_domain2    | MultiLoc2 indicator of plasma membrane targeting signal for the second protein                                         | 0.0000 | -0.0044 | 0.0159 |
| motif_search_peroxi_target2         | MultiLoc2 indicator of peroxisomal targeting signal for the second protein                                             | 0.0083 | 0.0062  | 0.0119 |
| motif_search_nuclear_bipartite2     | MultiLoc2 indicator of nuclear bipartite protein for the second protein                                                | 0.0094 | 0.0113  | 0.0103 |
| motif_search_predict_NLS2           | MultiLoc2 indicator of nuclear localization signal for the second protein                                              | 0.0136 | 0.0111  | 0.0127 |
| motif_search_nls_mono2              | MultiLoc2 indicator of nuclear localization signal for the second protein                                              | 0.0203 | 0.0168  | 0.0203 |
| motif_search_dna_associated_domain2 | MultiLoc2 indicator of dna associated domain for the second protein                                                    | 0.0160 | 0.0019  | 0.0232 |
| phyloloc_score_lys2                 | MultiLoc2 score for whether phylogenetic profile of second protein BLAST hits indicates lysosome localization (animal) | N/A    | N/A     | 0.0534 |
| goloc_score_lys2                    | MultiLoc2 score for whether inferred GO categories of the second protein match the lysosome membrane (animal)          | N/A    | N/A     | 0.0418 |
| svm_aac_score_lys2                  | MultiLoc2 score for whether the overall amino acid content of the second protein matches the lysosome (animal)         | N/A    | N/A     | 0.0523 |

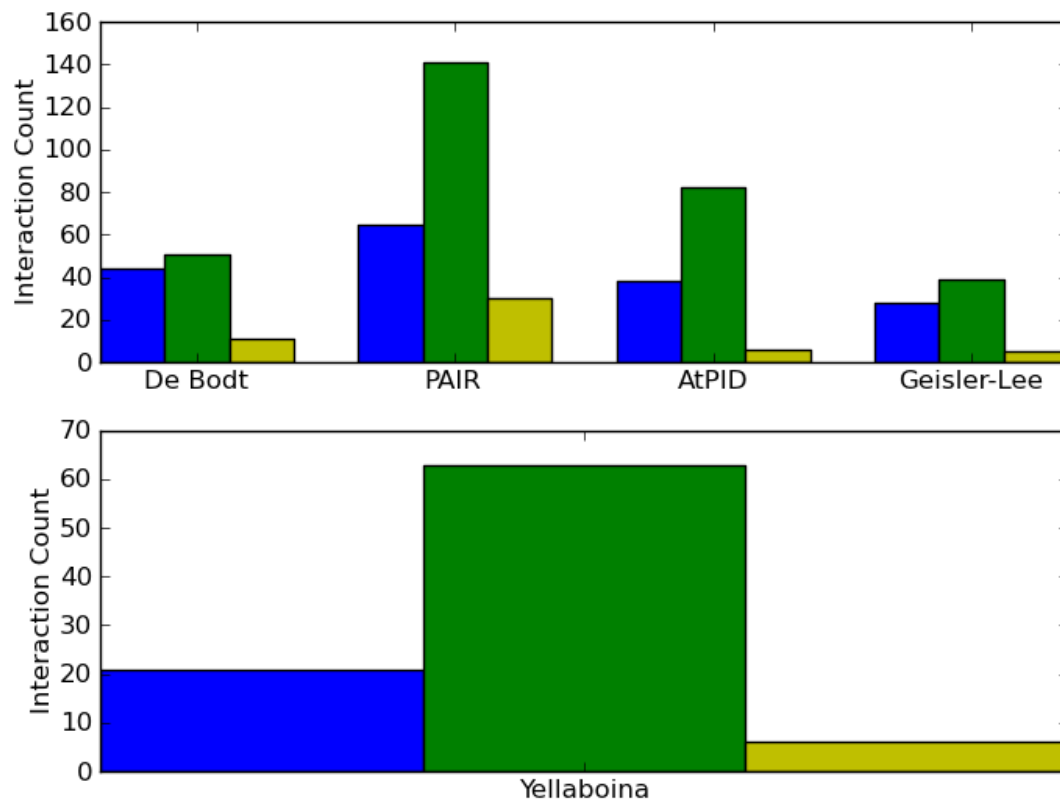

Supplemental Figure 1. The number of positive predictions on sets of novel experimentally-determined interactions for ENTS and several alternative prediction techniques when only allowing predictions involving proteins not contained in any of the training data. This is shown for *A. thaliana* (upper) and *M. musculus* (lower). ENTS results are shown in blue; the alternative classifiers' results are shown in green; and the number of positive predictions shared between each pair of classifiers is shown in yellow. Too few proteins unused for domain-pair odds calculation were available for *S. cerevisiae* and *H. sapiens* to obtain any predicted interactions using the alternative classifiers.

Supplemental Table 2. The total number of predicted interactions, the number of those interactions with experimental support, and the relative frequency of experimentally-supported interactions within this set among novel interactions from a high-throughput all-vs.-all Y2H experiment in *A. thaliana*.

| Comparison       | Predicted | Exp. Positive | Ratio       |
|------------------|-----------|---------------|-------------|
| ENTS/De Bodt     | 2838/1977 | 183/87        | 0.064/0.044 |
| ENTS/PAIR        | 5839/7355 | 253/298       | 0.043/0.041 |
| ENTS/AtPID       | 1695/839  | 128/112       | 0.075/0.133 |
| ENTS/Geisler-Lee | 1454/921  | 114/54        | 0.078/0.059 |

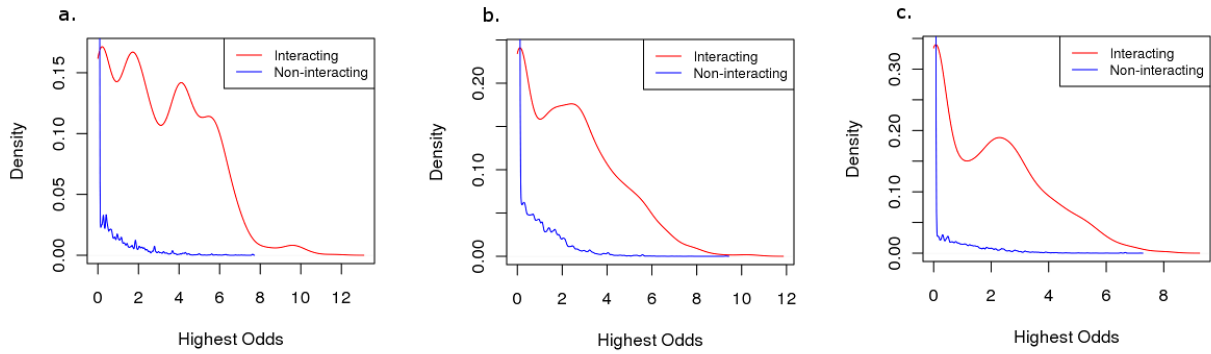

Supplemental Figure 1. Kernel density plots of the highest domain odds scores for interacting and non-interacting protein pairs in *A. thaliana* (a), *H. sapiens* (b), and *S. cerevisiae* (c).

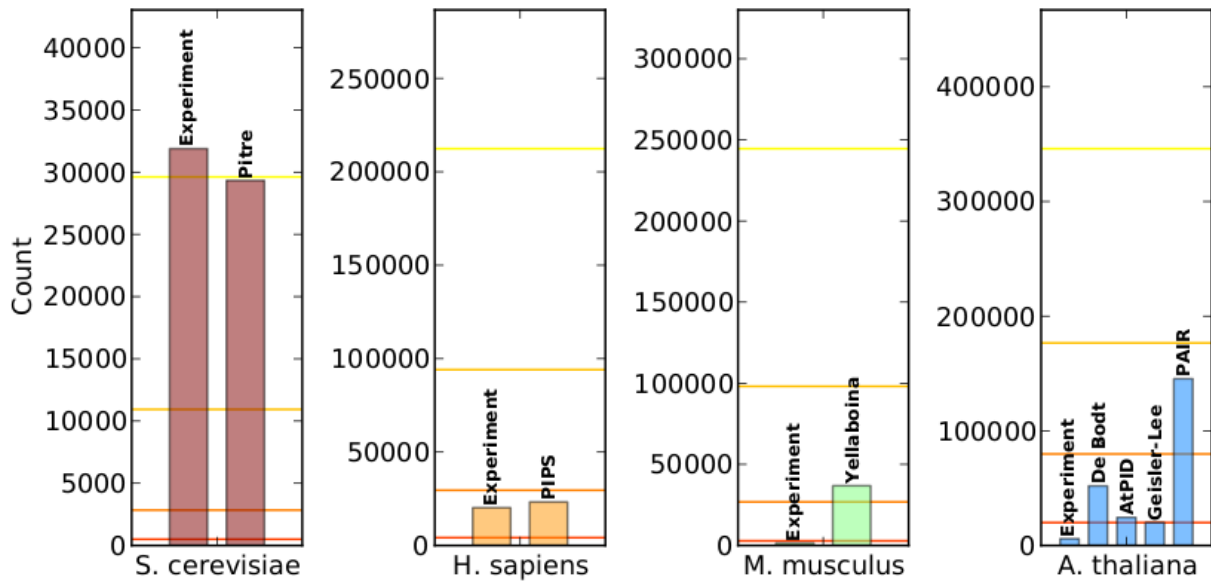

Supplemental Figure 2. The total number of interactions predicted by ENTS compared to other classifiers. ENTS results are shown as horizontal lines, with colors corresponding to confidence thresholds as follows: 0.55 (yellow), 0.65 (light orange), 0.75 (dark orange), 0.85 (red).



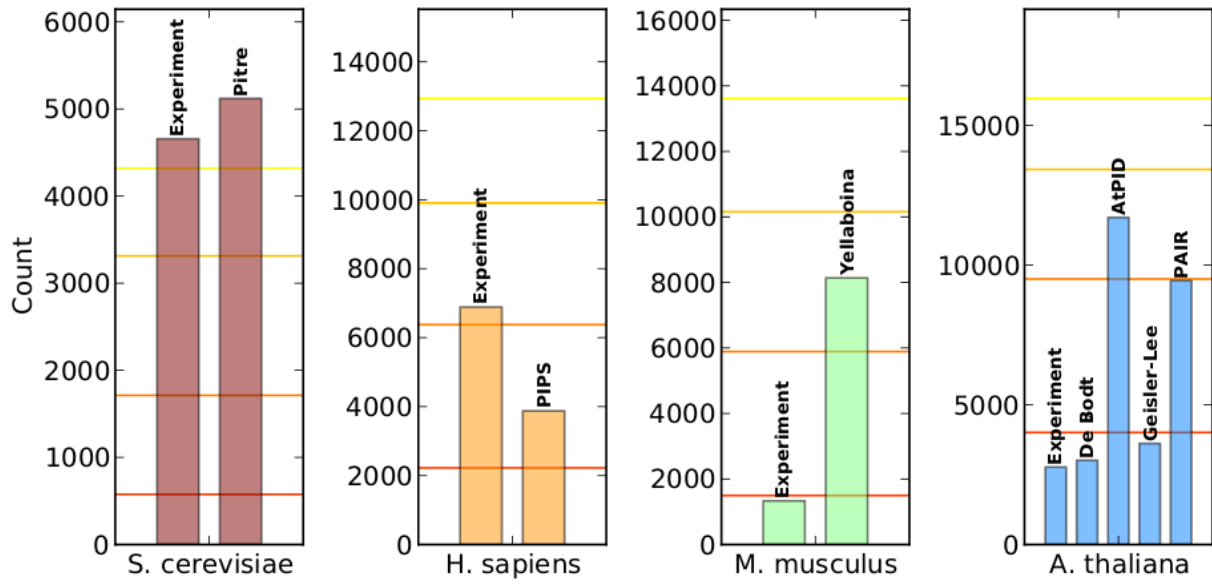

Supplemental Figure 3. The total number of genes with predicted interactions from ENTS compared to other classifiers.

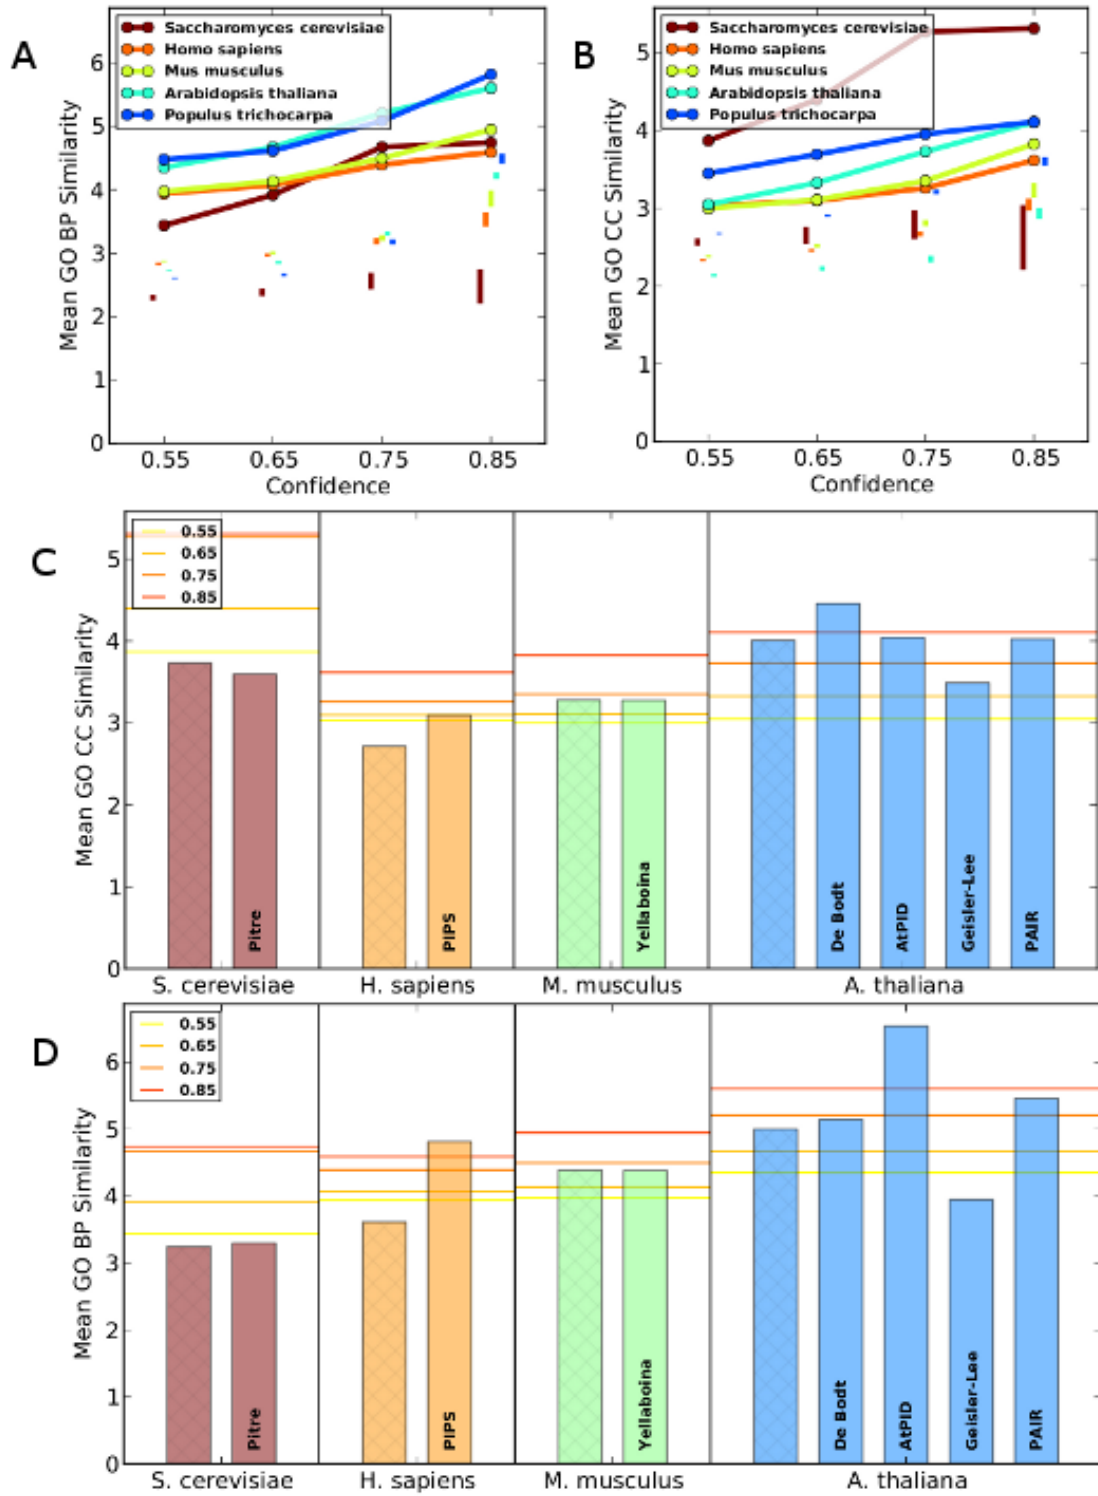

Supplemental Figure 4. (A) The mean GO biological process and (B) cellular component similarity scores for predicted ENTS interactions. Vertical lines at each confidence level show the total range for randomized networks. (D) Shared GO biological process and (C) cellular component similarity for ENTS as compared to other predicted networks.

Supplemental Table 3. 95% confidence intervals for coefficients in the logistic regressions on WGD retention in *P. trichocarpa* and *A. thaliana*. Models were fit using either all genes with at least one interaction in the ENTS predicted network or with the subset with at least 10 neighbors. Confidence intervals were based on non-parametric bootstrapping with 10,000 random resamplings.

| WGD                               | Data          | Intercept     | log(degree centrality) | duplicated neighbors | log(degree centrality):duplicated neighbors |
|-----------------------------------|---------------|---------------|------------------------|----------------------|---------------------------------------------|
| <i>P. trichocarpa</i><br>Salicoid | All genes     | (-2.46,-1.34) | (-0.31,-0.18)          | (4.08,5.77)          | (0.48,0.68)                                 |
|                                   | ≥10 neighbors | (-2.41,-0.84) | (-0.31,-0.12)          | (3.21,5.58)          | (0.38,0.67)                                 |
| <i>A. thaliana</i> α              | All genes     | (-2.40,-1.58) | (-0.15,-0.05)          | (4.52,6.97)          | (0.54,0.85)                                 |
|                                   | ≥10 neighbors | (-3.31,-0.98) | (-0.26,0.10)           | (3.68,9.80)          | (0.27,1.21)                                 |
| <i>A. thaliana</i> β/γ            | All genes     | (-2.87,-2.14) | (-0.09,0.01)           | (5.50,8.42)          | (0.55,0.90)                                 |
|                                   | ≥10 neighbors | (-4.18,-2.31) | (-0.31,-0.01)          | (7.65,18.14)         | (0.88,2.55)                                 |

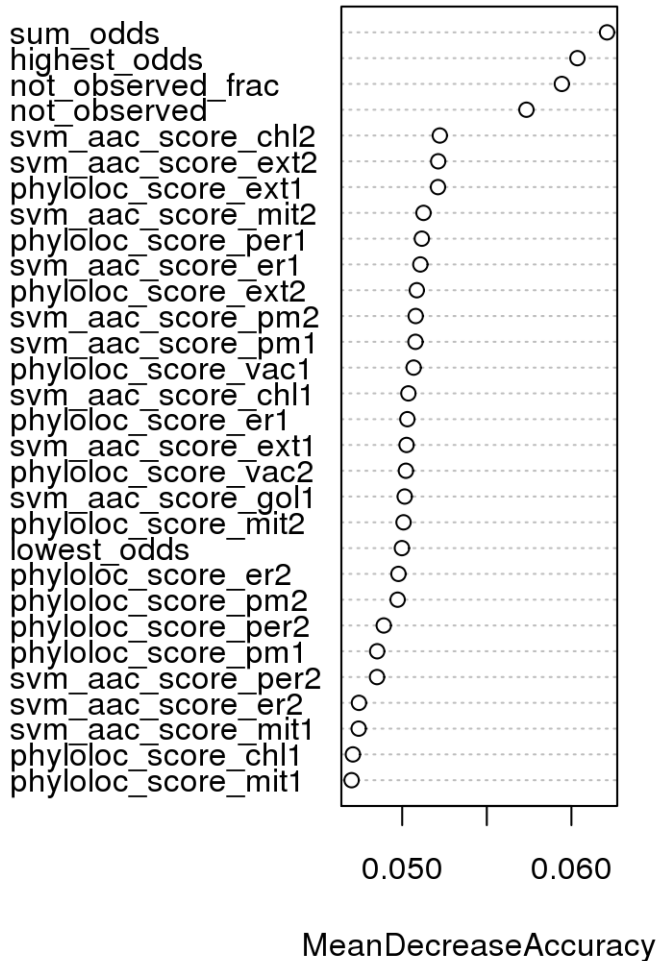

Supplemental Figure 6. Variable importance for the first 30 most important variables in the *A. thaliana*-trained ENTS classifier. Importance was measured as the mean decrease in OOB classification accuracy during training following permutation of the given variable.

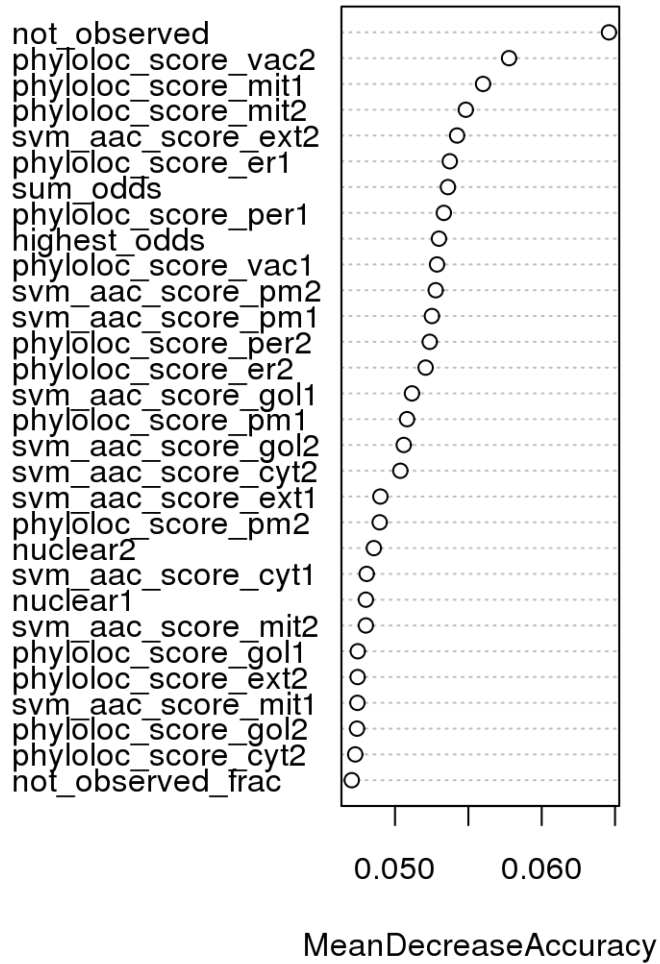

Supplemental Figure 7. Variable importance for the first 30 most important variables in the *S. cerevisiae*-trained ENTS classifier.

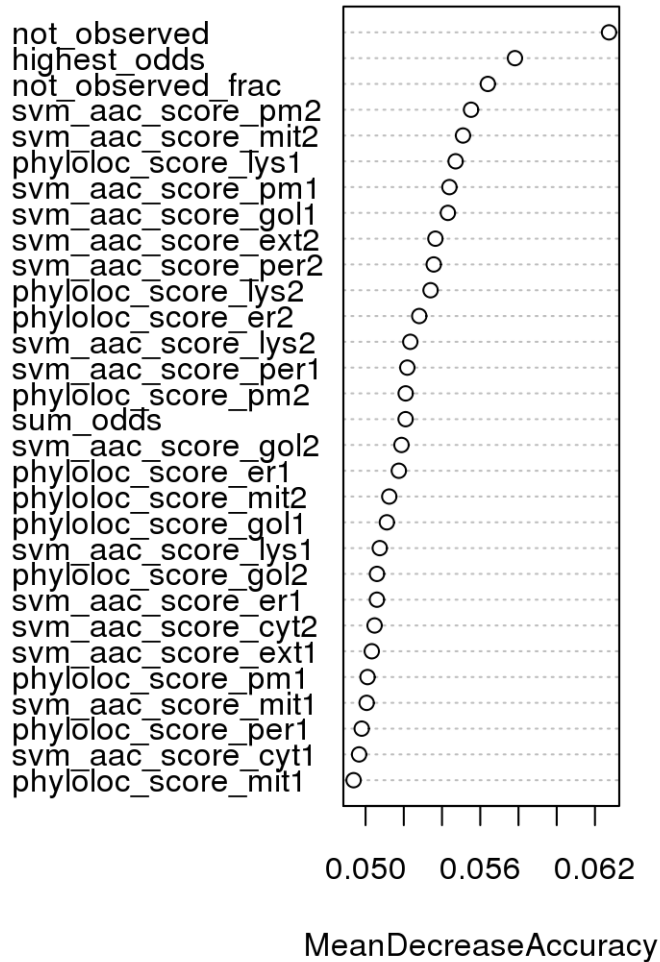

Supplemental Figure 8. Variable importance for the first 30 most important variables in the *H. sapiens*-trained ENTS classifier.
